# Supplementary material for: Curcumin-loaded high internal phase emulsions stabilized with lysine modified lignin: a biological agent with high photothermal protection and antibacterial properties
Source: Royal Society of Chemistry journal article supplement (doi:10.1039/d1fo00128k), 2021-01-01
Supplement: d1fo00128k1.pdf [file d1fo00128k1.pdf]

## Supplementary Information

### **Curcumin-loaded high internal phase emulsions stabilized with lysine modified lignin: A biological agent with high photothermal protection and antibacterial properties**

Kai Chen,<sup>a</sup> Shengrong Yuan,<sup>b</sup> Dan Wang,<sup>a</sup> Dongming Qi,<sup>a</sup> Fengfeng Chen,<sup>\*b</sup> Xueqing Qiu<sup>\*c</sup>

<sup>a</sup> College of Textile Science and Engineering (International Institute of Silk), Zhejiang Sci-Tech University, Hangzhou 310018, China

<sup>b</sup> School of Materials Science and Engineering, Zhejiang Sci-Tech University, Hangzhou 310018, China

<sup>c</sup> School of Chemical Engineering and Light Industry, Guangdong University of Technology, Waihuan Xi Road 100, Guangzhou, 510006, China

#### **Corresponding Author**

E-mail: [cff1993@zstu.edu.cn](mailto:cff1993@zstu.edu.cn); [xueqingqiu66@163.com](mailto:xueqingqiu66@163.com);

It Includes 4 Pages, 2 Tables, 2 Figures.

**Table S1.** The reaction parameters and yield of EHL-Lys-x.

| EHL<br>(g) | Lys/Phenolic hydroxyl of EHL<br>(molar ratio) | Lys/Glyoxal<br>(molar ratio) | Yield<br>(%) |
|------------|-----------------------------------------------|------------------------------|--------------|
| 4.0        | 0.5:1.0                                       | 1:1                          | 88.0         |
| 4.0        | 1.0:1.0                                       | 1:1                          | 87.7         |
| 4.0        | 1.5:1.0                                       | 1:1                          | 89.5         |
| 4.0        | 2.0:1.0                                       | 1:1                          | 87.5         |

**Table S2.** Experimental factors & levels for HIPEs stabilized with EHL-Lys-x.

| Samples | EHL-Lys-x    | EHL-Lys-x content | APG | Oil  |
|---------|--------------|-------------------|-----|------|
|         |              | wt%               | wt% | vol% |
| HIPEs-1 | EHL-Lys-0.5  | 5.0               | 3.0 | 87   |
| HIPEs-2 | EHL-Lys-1.0  | 5.0               | 3.0 | 87   |
| HIPEs-3 | EHL-Lys -1.5 | 5.0               | 3.0 | 87   |
| HIPEs-4 | EHL-Lys -2.0 | 5.0               | 3.0 | 87   |

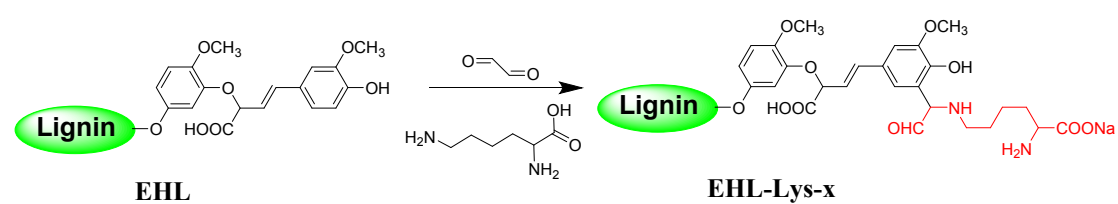

**Scheme. S1** The reactions mechanism of EHL-Lys-x.

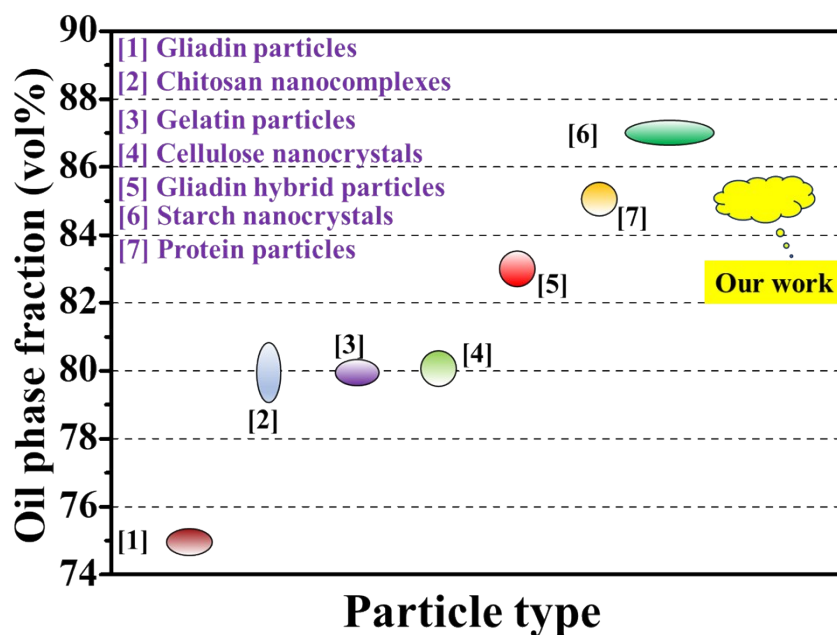

**Figure S1.** Maximum oil phase volume fraction in O/W HIPPEs stabilized with different food-grade emulsifier.

#### References

- [1] F. Z. Zhou, T. Zeng, S. W. Yin, C. H. Tang, D. B. Yuan, X. Q. Yang, Development of antioxidant gliadin particle stabilized Pickering high internal phase emulsions (HIPPEs) as oral delivery systems and the in vitro digestion fate, *Food Funct.* 9 (2018) 959-970.
- [2] X. N. Huang, F. Z. Zhou, T. Yang, S.W. Yin, C.H. Tang, X.Q. Yang, Fabrication and characterization of Pickering High Internal Phase Emulsions (HIPPEs) stabilized by chitosan-caseinophosphopeptides nanocomplexes as oral delivery vehicles, *Food Hydrocolloids* 93 (2019) 34-45.
- [3] H. Tan, L. Zhao, S. Tian, T. Ngai, Gelatin particle-stabilized high-internal phase emulsions for use in oral delivery systems: protection effect and in vitro digestion study, *J. Agric. Food Chem.* 65 (2017) 900-907.

- [4] F. Liu, J. Zheng, C. H. Huang, C. H. Tang, S. Y. Ou, Pickering high internal phase emulsions stabilized by protein-covered cellulose nanocrystals, *Food Hydrocolloids* 82 (2018) 96-105.
- [5] F. Z. Zhou, T. Zeng, S. W. Yin, C. H. Tang, D. B. Yuan, X. Q. Yang, Development of antioxidant Pickering high internal phase emulsions (HIPEs) stabilized by protein/polysaccharide hybrid particles as potential alternative for PHOs, *Food Chem.* 231 (2017) 122-130.
- [6] T. Yang, J. Zheng, B. S. Zheng, F. Liu, S. Wang, C. H. Tang, High internal phase emulsions stabilized by starch nanocrystals, *Food Hydrocolloids* 82 (2018) 230-238.
- [7] B. Jiao, A. Shi, Q. Wang, B.P. Binks, High-Internal-Phase Pickering Emulsions Stabilized Solely by Peanut Protein-Isolate Microgel Particles with Multiple Potential Applications, *Angew. Chem. Int. Ed.* 57 (2018) 9274-9278.
